# Supplementary material for: Systemic Analyses of the Expression of TPI1 and Its Associations with Tumor Microenvironment in Lung Adenocarcinoma and Squamous Cell Carcinoma
Source: Hindawi journal article supplement (doi:10.1155/2022/6258268), 2022-01-25

**A**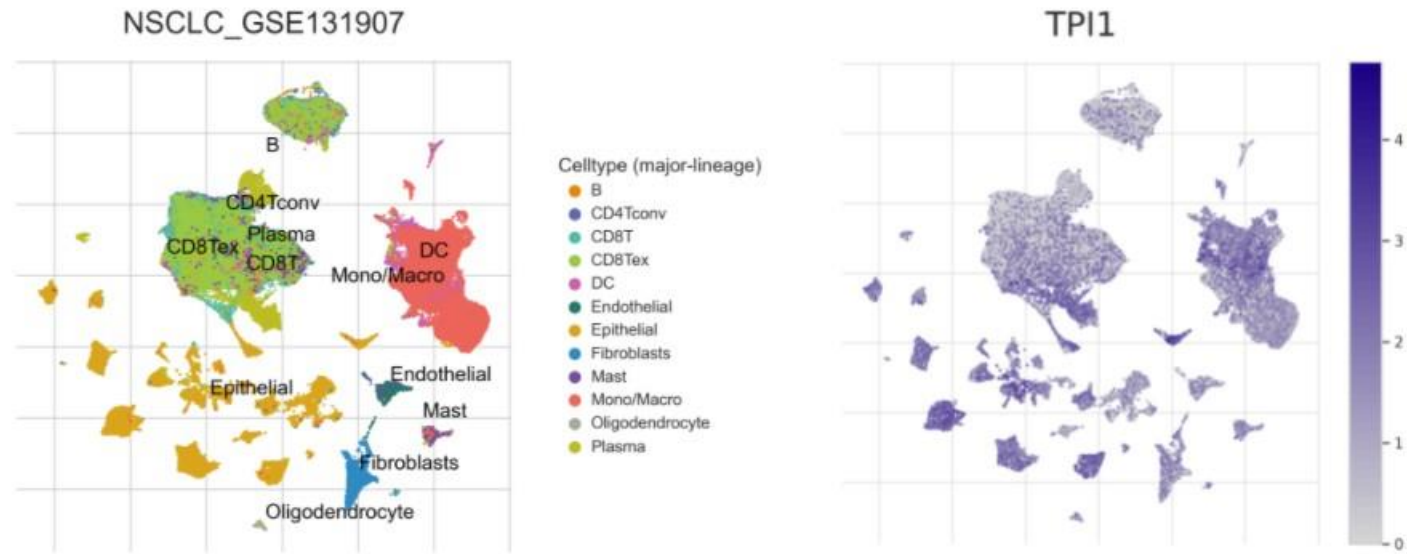**B**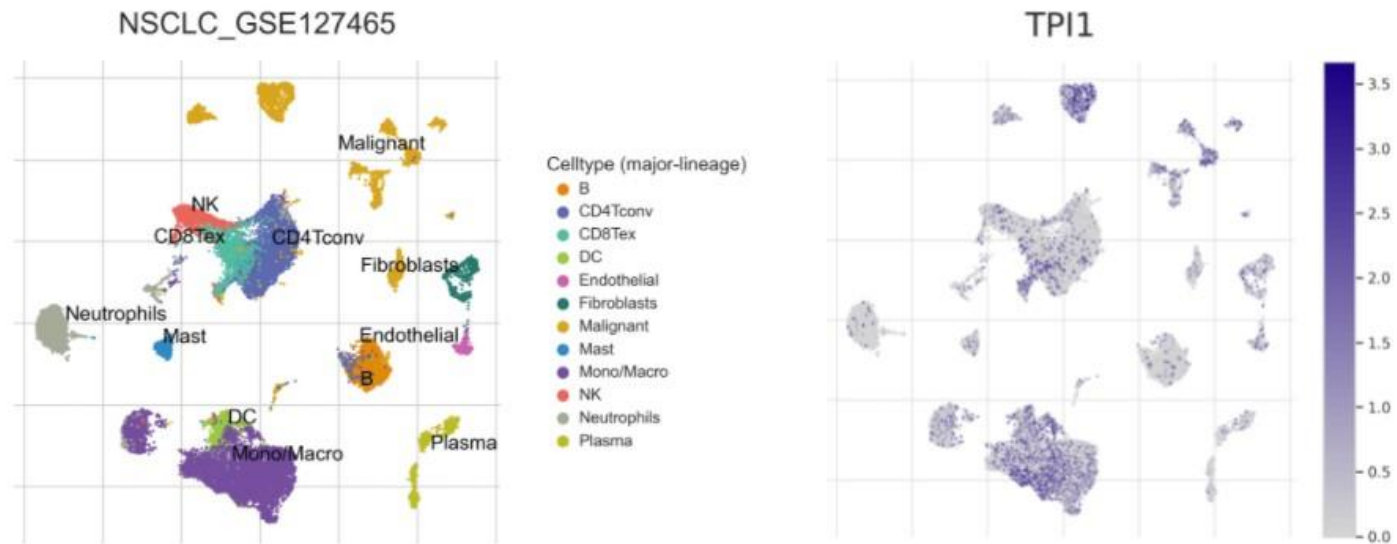

Supplement: f3 [file 6258268.f3.pdf]
