# Supplementary material for: Systemic Analyses of the Expression of TPI1 and Its Associations with Tumor Microenvironment in Lung Adenocarcinoma and Squamous Cell Carcinoma
Source: Hindawi journal article supplement (doi:10.1155/2022/6258268), 2022-01-25

**A**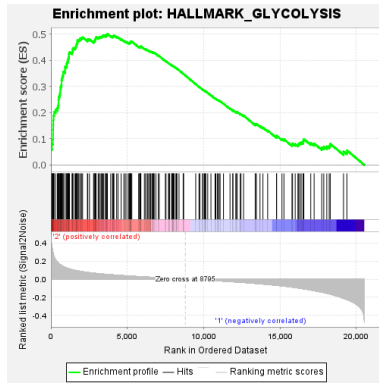**B**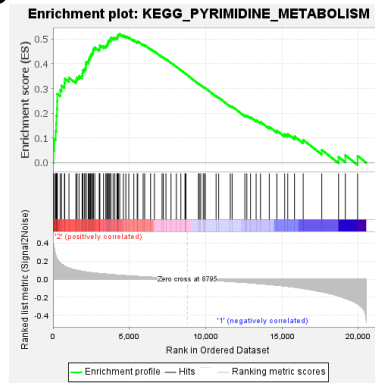**C**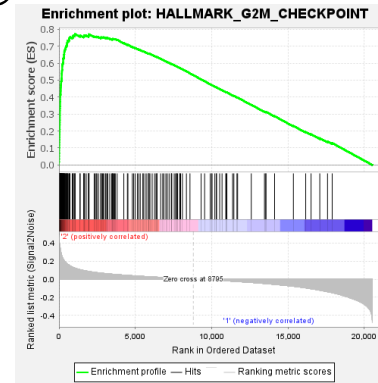**D**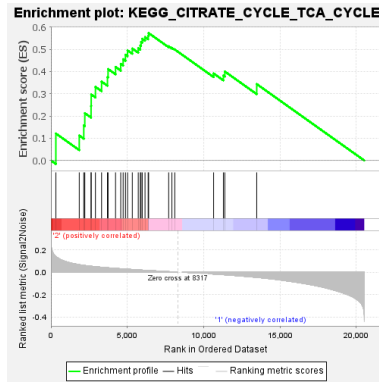**E**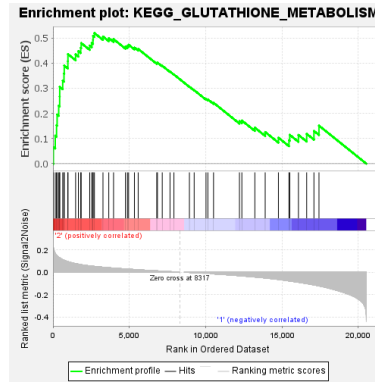**F**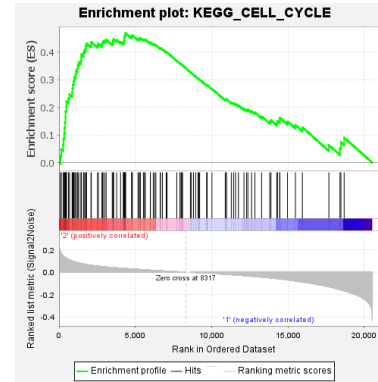**G**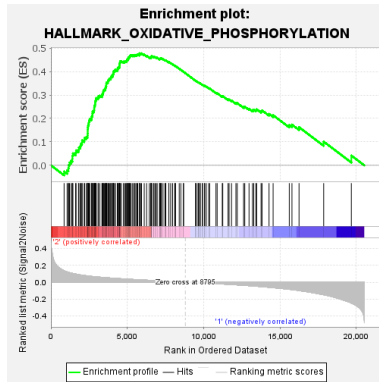**H**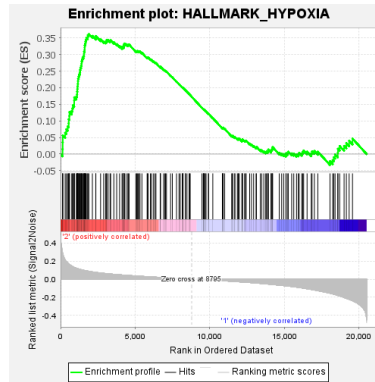**I**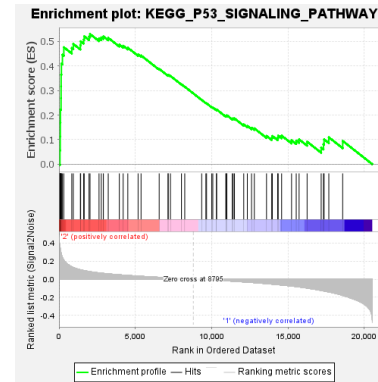

Supplement: f4 [file 6258268.f4.pdf]
